# Quantifying Selection on Codon Usage in Signal Peptides: Gene Expression and Amino Acid Usage Explain Apparent Selection for Inefficient Codons

Alexander L. Cope<sup>1</sup>, Robert L. Hettich<sup>1,2</sup>, and Michael A. Gilchrist<sup>1,3,4</sup>

<sup>1</sup>Genome Science and Technology, University of Tennessee, Knoxville

<sup>2</sup>Chemical Sciences Division, Oak Ridge National Laboratory, Oak Ridge,

TN

<sup>3</sup>Department of Ecology and Evolutionary Biology, University of

Tennessee, Knoxville

<sup>4</sup>National Institute for Mathematical and Biological Synthesis, Knoxville,

TN

Last compiled on Thursday 14<sup>th</sup> June, 2018 at 18:44.

## 1 **Abstract**

2 Secreted proteins play central roles across all taxa. Although secretion mechanism can vary  
3 across taxa, all taxa share the Sec secretion pathway. A critical and distinct feature shared  
4 by Sec secreted proteins is the signal peptide. Researchers claim signal peptides contain a  
5 bias for translation inefficient codons in signal peptides, leading researchers to suggest selec-  
6 tion favors translation inefficiency in this region. We investigate codon usage in the signal  
7 peptides of *E. coli* using the Codon Adaptation Index (CAI) and tRNA Adaptation Index  
8 (tAI), and the ribosomal overhead cost formulation of the stochastic evolutionary model  
9 of protein production rates (ROC-SEMPPR). Initial comparisons between signal peptides  
10 and 5'-ends of non-signal peptide genes using CAI and tAI are consistent with translation-  
11 ally inefficient codons being preferred in signal peptides. However, simulations reveal these  
12 differences are due to amino acid usage and gene expression – we find evidence for novel  
13 selection disappears when accounting for both of these factors. In contrast, ROC-SEMPPR,  
14 a mechanistic population genetics model capable of separating the effects of selection and  
15 mutation bias, shows codon usage bias (CUB) of the signal peptides is indistinguishable from  
16 the 5'-coding regions of cytoplasmic proteins. Additionally, we find CUB in the 5'-coding  
17 regions is weaker than later segments of the gene. Results illustrate the value in using mod-  
18 els grounded in population genetics to interpret genetic data. In summary, we show failure  
19 to account for mutation bias and the effects of gene expression on the efficacy of selection  
20 against translation inefficiency can lead to a misinterpretation of codon usage patterns.

## 21 **Introduction**

22 A secreted protein can broadly be defined as any protein entering a secretory pathway  
23 for transport through a cellular membrane. These proteins serve important cellular func-  
24 tions, including metabolism and antibiotic resistance (Green and Mecsas, 2016; Saier, 2006).  
25 Secreted proteins also play essential roles in the virulence of pathogenic bacteria (Green

26 and Mecsas, 2016). Numerous secretion systems exist and vary between and within taxa  
27 (Bendtsen *et al.*, 2005; Green and Mecsas, 2016; Saier, 2006). Despite the diversity of secre-  
28 tion pathways, the general secretion pathway, also commonly referred to as the Sec pathway,  
29 is found across all domains of life (Green and Mecsas, 2016; Natale *et al.*, 2008). In brief,  
30 proteins are transported to the SecYEG translocon located in the membrane via the SecA/B  
31 chaperone-dependent (SecA/B and SRP) or chaperone-independent manner (Natale *et al.*,  
32 2008; Tsirigotaki *et al.*, 2017). All SecA/B-dependent proteins and chaperone-independent,  
33 as well as some SRP-dependent proteins, contain a short peptide chain located at the N-  
34 terminus of the protein (Green and Mecsas, 2016; Natale *et al.*, 2008; Tsirigotaki *et al.*, 2017)  
35 This short peptide chain is called the signal peptide which is essential for the protein to enter  
36 into the SecYEG translocon. Although signal peptides do vary in their amino acid sequences,  
37 signal peptides have distinct physicochemical properties which constrain their amino acid  
38 usage. A signal peptide generally consists of 3 regions: a positively charged N-terminus,  
39 a hydrophobic core, and a polar C-terminus, where the signal peptide is cleaved from the  
40 rest of the protein (a.k.a. the mature peptide) (Natale *et al.*, 2008; Tsirigotaki *et al.*, 2017;  
41 Zalucki *et al.*, 2009).

42 The ability to accurately predict signal peptides is useful for identifying secreted proteins  
43 in non-model organisms; this has led to the development of machine learning approaches  
44 to predict signal peptides which take advantage of the distinct physicochemical properties  
45 of signal peptides, such as SignalP (Petersen *et al.*, 2011). Although the physicochemical  
46 properties of signal peptides are consistent, previous work found altering the N-terminus  
47 has a range of effects on protein secretion: from a decrease in secretion to no effect (Inouye  
48 *et al.*, 1982; Nesmeyanova *et al.*, 1997; Puziss *et al.*, 1989; Vlasuk *et al.*, 1983). These varying  
49 effects led some researchers to suspect other mechanisms also contribute to the efficacy of  
50 protein secretion (Zalucki *et al.*, 2009, 2011a).

51 Numerous studies suggest codon usage bias (CUB) – the non-uniform usage of synony-  
52 mous codons – contributes to effective protein secretion in *E. coli* (Burns and Beacham,

53 1985; Power *et al.*, 2004; Zalucki and Jennings, 2007; Zalucki *et al.*, 2008, 2010, 2011b).  
54 Power *et al.* (2004) found *E. coli* K12 MG1655 signal peptides are biased for translation  
55 inefficient codons, which are predicted to be translated slower than their synonymous coun-  
56 terparts. This is in stark contrast to the rest of the *E. coli* proteome, where *E. coli* is biased  
57 towards the most efficient codons (Ikemura, 1981; Power *et al.*, 2004). Li *et al.* (2009); Liu  
58 *et al.* (2017); Mahlab and Linial (2014) examined the usage of inefficient codons in signal  
59 peptides of *S. coelicolor*, *S. cerevisiae*, and various multicellular eukaryotes and came to  
60 similar conclusions when applying codon usage indices such as the Codon Adaptation Index  
61 (CAI, Sharp and Li, 1987) and tRNA Adaptation Index (tAI, dos Reis *et al.*, 2004). Consis-  
62 tent across this work is the interpretation that selection is driving the apparent increase in  
63 inefficient codon usage in signal peptides. Similar studies concluded an overabundance of the  
64 lysine codon AAA at the second position in the signal peptide promoted efficient translation  
65 initiation (Zalucki *et al.*, 2007).

66 Researchers proposed an adaptive role for inefficient codons in the protein secretion pro-  
67 cess in which the combination of efficient translation initiation and inefficient translation  
68 resulted in reduced distance between sequential ribosomes translating the mRNA of a pro-  
69 tein containing a signal peptide (Zalucki *et al.*, 2009, 2011a). They argued this would lead  
70 to more efficient recycling of the chaperones involved in the secretion process. Other expla-  
71 nations for the observed increase in inefficient codons include the inability of *E. coli* SRP to  
72 induce a translational pause following signal peptide recognition (Powers and Walter, 1997;  
73 Zalucki *et al.*, 2009) and slowing down the co-translational folding of the protein, as a folded  
74 protein cannot be translocated through the SecYEG translocon (Power *et al.*, 2004; Zalucki  
75 and Jennings, 2007; Zalucki *et al.*, 2008, 2011a). If signal peptides have a different CUB  
76 relative to the rest of the genome, then codon-level information could be incorporated into  
77 signal peptide prediction tools.

78 In contrast, a recent analysis of ribosome profiling data found no difference in the ri-  
79 bosome densities of the signal peptides and the 5'-ends of nonsecretory genes in various

80 eukaryotes (Liu *et al.*, 2017). If selection were acting on codon usage in signal peptides to  
81 slow down translation, we would expect to see higher ribosome densities in these regions.  
82 Additionally, while both Mahlab and Linial (2014) and Liu *et al.* (2017) examined codon  
83 usage in relation to secretion in *H. sapiens* using a metric based on tAI, only Mahlab and  
84 Linial (2014) found results consistent with increased frequencies of inefficient codons in sig-  
85 nal peptides. From a population genetics perspective, it is surprising statistically significant  
86 results were obtained in a mammal, which usually have little adaptive CUB due to their  
87 lower effective population sizes (Charlesworth, 2009; Lynch *et al.*, 2016). More recently,  
88 Samant *et al.* (2014) found codon optimization of a signal peptide improved localization of  
89 the protein to the periplasm of *E. coli*, seemingly contradicting a general role for inefficient  
90 codon usage in signal peptides. A potential reason for these contradictions is the previous  
91 analyses of signal peptide codon usage by Li *et al.* (2009); Liu *et al.* (2017); Mahlab and  
92 Linial (2014); Power *et al.* (2004) did not adequately account for the evolutionary forces  
93 shaping codon usage (Bulmer, 1990; Gilchrist *et al.*, 2015; Shah and Gilchrist, 2011; Wallace  
94 *et al.*, 2013).

95 We re-examined CUB in signal peptides of *E. coli* using CAI, tAI, and ROC-SEMPPR - a  
96 population genetics model which accounts for selection, mutation bias, and gene expression  
97 - to determine if selection on codon usage in signal peptides differs from the 5'-ends of  
98 genes. Although we find significant differences in codon usage using CAI and tAI, we present  
99 evidence these differences are due to signal peptide-specific amino acid biases and differences  
100 in the gene expression distributions of signal peptide and non-signal peptide genes. When  
101 comparing signal peptides and the 5'-ends of non-signal peptide genes with ROC-SEMPPR,  
102 we find signal peptide codon usage is consistent with the 5'-ends of genes not containing a  
103 signal peptide. We find selection on codon usage favors the efficient codons, but the strength  
104 of selection is weaker at the 5'-ends, corroborating previous analyses (Eyre-Walker, 1996;  
105 Gilchrist and Wagner, 2006; Gilchrist, 2007; Power *et al.*, 2004; Qin *et al.*, 2004).

106 Our work demonstrates the value of analyzing CUB from a formal population genetics

107 framework, as well as highlights potential limitations with using more common metrics such  
108 as CAI for analyzing codon usage on relatively small regions of the genome. Failure to ac-  
109 count for variation in the strength of selection due to variation in gene expression can lead  
110 to conflating mutation bias with selection, resulting in a misinterpretation of observed codon  
111 usage patterns. Our work also illustrates the importance of considering non-adaptive forces  
112 in shaping biological phenomenon before invoking adaptive explanations (Gould and Lewon-  
113 tin, 1979). We believe this is particularly important in the modern genomic-age when the  
114 combination of large datasets, misinterpretation of p-values, and and inherent bias towards  
115 adaptationist interpretations could mislead researchers.

## 116 **Materials and Methods**

### 117 **Signal Peptide Prediction**

118 Signal peptides were predicted using SignalP 4.1 (Petersen *et al.*, 2011) using both the  
119 default cutoff D-score of 0.51 and a more conservative D-score of 0.75. In brief, SignalP  
120 consists of two neural networks, one for determining the amino acid sequence similarity to  
121 signal peptides and the other for identifying the most likely cleavage site. The results of  
122 both neural networks are combined into one value, called the D-score. The D-score ranges  
123 between 0 and 1. Setting the cutoff D-score closer to 1 results in a lower false positive rate. A  
124 set of confirmed signal peptides for *E. coli* K12 MG1655 was taken from The Signal Peptide  
125 Website. All analyses in the main text will focus on the set of signal peptides with  $D \geq 0.51$   
126 as this set provides us with the most data; analyses of the  $D > 0.75$  and set of confirmed  
127 signal peptides give similar results (see Supplementary Material).

### 128 **ROC-SEMPPR**

129 Given a set of protein-coding genes, ROC-SEMPPR employs a Markov Chain Monte Carlo  
130 (MCMC) to estimate codon specific parameters for mutation bias  $\Delta M$  and pausing times  $\Delta \eta$

131 for each codon within a synonymous codon family (Table 1). In previous work,  $\Delta\eta$  was scaled  
132 relative to the most efficient codon, which had  $\Delta\eta$  and  $\Delta M$  values fixed at 0. To avoid the  
133 choice of reference codon affecting our comparisons of CUB between regions, all  $\Delta\eta$  values  
134 in this paper are re-scaled such that these values are centered around 0 for each amino acid.  
135 The  $\Delta\eta$  values reflect the strength and direction of selection against translation inefficiency  
136 in a set of protein-coding regions (e.g. the signal peptides). A region with stronger selection  
137 against translation inefficiency will have higher  $\Delta\eta$  values on average than a region with  
138 weaker selection. Similarly, a region which favors translation inefficiency would be expected  
139 to have  $\Delta\eta$  values which negatively correlate with a region which favors translation efficiency.

140 ROC-SEMPPR also estimates an average protein production rate  $\phi$  for each gene (Table  
141 1). We find ROC-SEMPPR estimated  $\phi$  values correlate well with empirical measurements of  
142 protein production rates for *E. coli* (see Supplementary Methods: Assessing ROC-SEMPPR  
143 Model Adequacy and Figures S1 - S2). If changes in synonymous codon usage alter the  
144 efficiency at which a protein is translated, then such a change will have the largest impact  
145 on the energetic costs of proteins with high production rates, making  $\phi$  a more appropriate  
146 gene expression metric than say, mRNA abundance or protein abundance. Thus, we use  
147 protein production rates  $\phi$  as our metric of gene expression. For more details on ROC-  
148 SEMPPR, see Gilchrist *et al.* (2015). Analysis of CUB with ROC-SEMPPR was performed  
149 using AnaCoDa (Landerer *et al.*, 2018).

| Parameters     | Description                                                     |
|----------------|-----------------------------------------------------------------|
| $\Delta\eta_i$ | Cost of translating codon $i$ relative to reference codon       |
| $\Delta M_i$   | Mutation bias towards codon $i$ relative to the reference codon |
| $\phi_k$       | Average Protein Production Rate of gene $k$                     |

Table 1: Description of ROC-SEMPPR parameters used in this paper.

## 150 CAI and tAI

151 Analysis of CUB was also performed using CAI (Sharp and Li, 1987) and tAI (dos Reis  
152 *et al.*, 2004). Both CAI and tAI quantify CUB by assigning weights to the 61 sense codons.  
153 For CAI, each codon is assigned a weight based on its relative frequency to its synonymous  
154 counterparts in a reference set of highly expressed genes, such as ribosomal protein coding  
155 genes. The key assumption of CAI is the most frequent codons in the reference set are  
156 the most efficient codons (Sharp and Li, 1987). In contrast, tAI assigns weights based on  
157 tRNA abundances corresponding to a codon, as well as accounting for codon-anticodon  
158 interactions. The key assumption of tAI is the most efficient codons are usually those with  
159 the most abundant tRNA (dos Reis *et al.*, 2004).

160 CAI and tAI both range between 0 and 1. A CAI score closer to 1 represents a sequence  
161 which more closely resembles the codon usage of the reference set of genes, while a tAI  
162 closer to 1 indicates a sequence is more closely adapted to the genomic tRNA pool (dos Reis  
163 *et al.*, 2004; Sharp and Li, 1987). Calculations for CAI were performed using the AnaCoDa  
164 (Landerer *et al.*, 2018), while tAI was calculated using the R package tAI (dos Reis, 2016).

## 165 Generating Datasets

166 Previous analysis of the *E. coli* genome found a set of genes with CAI values that had a  
167 negative correlation with their gene expression estimates (dos Reis *et al.*, 2003). It is expected  
168 many of these genes were the result of horizontal gene transfer and had not yet reached  
169 evolutionary equilibrium with respect to their CUB. We repeated the analysis described in  
170 dos Reis *et al.* (2003) on the current *E. coli* K12 MG1655 genome (version 3 ,NC\_000913.3).  
171 Briefly, correspondence analysis was performed using CodonW (Peden, 1999), followed by  
172 clustering based on the principle axis scores using the CLARA algorithm (Maechler *et al.*,  
173 2018) in R. Our analysis was consistent with the findings of (dos Reis *et al.*, 2003), revealing  
174 782 genes with a CUB deviating significantly from the majority of the *E. coli* genome. We  
175 will refer to this set of 782 genes as the “exogenous” component of the genome and the rest of



176 the *E. coli* genome as the “endogenous” for simplicity. All analyses presented will consider  
177 only “endogenous” genes because the “exogenous” genes may violate the assumptions of  
178 ROC-SEMPPR, CAI, and tAI.

179 Proteins with a signal peptide were split into the signal peptide and the mature peptide  
180 – the segment of the peptide chain after the signal peptide. On average, the signal peptides  
181 were 23 codons long. For comparisons to the 5'-ends of nonsecretory genes – defined here  
182 as those lacking a signal peptide – the first 23 codons of the nonsecretory genes were used.  
183 We note the nonsecretory genes have an average protein production rate  $\phi$  lower than that  
184 of the signal peptide genes ( $\bar{\phi} = 0.992$  and  $\bar{\phi} = 1.08$ , respectively, Figure S3).

185 As the strength of selection on CUB scales with protein production rate  $\phi$ , we created a  
186 control group that eliminates differences in the distribution of  $\phi$  for the nonsecretory genes  
187 and signal peptide genes. Specifically, the nonsecretory genes were selected using acceptance-  
188 rejection sampling to create the “pseudo-secreted proteins”. In brief, acceptance-rejection  
189 sampling is a procedure for sampling from a population such that its distribution of a metric  
190 for one population mirrors the distribution of the same metric for another population. In  
191 this case, the pseudo-secreted proteins were sampled such that the mean and variance of the  
192  $\log(\phi)$  values reflected those of the genes with a signal peptide. The CUB signature of a  
193 gene varies with protein production rate  $\phi$ ; thus we can be more confident any differences  
194 seen between genes with a signal peptide and pseudo-signal peptide genes are not due to  
195 differences in their respective  $\phi$  distributions. All pseudo-secreted proteins were split into two  
196 regions we will refer to as the “pseudo-signal peptides” and the “pseudo-mature peptides”  
197 (the first 23 codons and the remainder of the gene, respectively).

198 To assess the performance of CAI and tAI when comparing regions with differences in the  
199 distributions of protein production rates  $\phi$  and amino acid biases, simulated sequences were  
200 used. Sequences based on the 5'-ends of nonsecretory genes, pseudo-signal peptides, and  
201 signal peptides were simulated using the AnaCoDa package (Landerer *et al.*, 2018). To nor-  
202 malize for amino acid usage, sequences 23 amino acids in length were randomly generated to

203 match the amino acid frequencies of the signal peptides. The codon usage of these sequences  
204 was also simulated in AnaCoDa, assuming either the  $\phi$  distribution of the nonsecretory genes  
205 or the pseudo-secreted proteins. All sequences were simulated using the pausing times  $\Delta\eta$   
206 and mutation bias  $\Delta M$  parameters estimated from the 5'-end of endogenous nonsecretory  
207 genes.

## 208 CUB analyses

209 We estimated protein production rates  $\phi$  by fitting ROC-SEMPPR to the complete protein-  
210 coding sequences in the *E. coli* K12 MG1655 genome. Analysis of intragenic (eg. signal  
211 vs. mature peptides) and intergenic (eg. pseudo-signal peptides vs. real signal peptides)  
212 CUB was carried out using the mixture distribution functionality available in the AnaCoDa  
213 implementation of ROC-SEMPPR (Landerer *et al.*, 2018). Each group of regions (eg. signal  
214 peptides, mature peptides, etc.) was assumed to have an independent CUB, allowing pausing  
215 time  $\Delta\eta$  estimates to vary between them. We assumed mutation bias was consistent for the  
216 entire genome; thus, we forced mutation bias  $\Delta M$  parameters to be equal across the groups  
217 of regions.  $\phi$  was fixed for each region at the value estimated from the region's corresponding  
218 complete protein-coding sequence. This is done for two reasons: (a) shorter regions, such as  
219 the signal peptide, likely have insufficient information to accurately estimate  $\phi$  and (b) this  
220 guarantees our gene expression metric has the same impact on the estimates of  $\Delta\eta$  and  $\Delta M$   
221 for intragenic regions, such as a signal peptide and its corresponding mature peptide.

222 A Model-II regression was used to compare pausing times  $\Delta\eta$  between regions. Unlike  
223 ordinary least squares, Model-II regression, or errors-in-variables regression, accounts for  
224 errors in both the  $x$  and  $y$  variables (Sokal and Rohlf, 1995). When both variables are  
225 subject to error, which is the case for the  $\Delta\eta$  estimates, the use ordinary least squares leads  
226 to downwardly biased parameter estimates. A Model-II regression slope  $\beta = 1$  (or the  $y = x$   
227 line) will serve as the null hypothesis, as this indicates both the strength and direction of  
228 selection between two regions are the same. The intercept parameter was fixed at  $\alpha = 0$

229 because the  $\Delta\eta$  estimates are scaled such that the mean value of  $\Delta\eta$  is 0. We note that when  
230 we allowed the  $\alpha$  parameter to vary, it was as expected, approximately 0. For more details  
231 on our use of Model-II regression, see Supplementary Methods.

232 CAI and tAI were used to compare codon usage between signal peptides, 5'-ends, and  
233 pseudo-signal peptides (dos Reis *et al.*, 2003, 2004; Sharp and Li, 1987). As recommended  
234 by Sharp and Li (1987), methionine and tryptophan were not included when normalizing for  
235 the length of the gene in our calculations of CAI. Statistical significance was assessed using  
236 a one-tailed Welch's t-test in R (R Core Team, 2018). R and Python scripts used for this  
237 paper can be found at [https://github.com/acope3/Signal\\_Peptide\\_Scripts](https://github.com/acope3/Signal_Peptide_Scripts).

## 238 Results

239 Our analysis of CUB in signal peptides and the 5'-ends of nonsecretory genes using ROC-  
240 SEMPPR revealed these regions to be highly similar. Qualitatively, the expected codon  
241 frequencies for the 5'-ends of nonsecretory genes and the signal-peptides based on the pausing  
242 time  $\Delta\eta$  and mutation bias  $\Delta M$  values estimated from these regions are similar (Figure S4).  
243 Notable exceptions appear to be cysteine, aspartic acid, lysine, glutamine, and tyrosine;  
244 however, the 95% posterior probability intervals of cysteine and glutamine are the only  
245 ones which fail to overlap with  $y = x$  line. When comparing the pausing times  $\Delta\eta$  of  
246 signal peptides to the 5'-ends of nonsecretory genes using a Model-II regression, we find no  
247 significant difference from the  $y = x$  line (slope  $\beta$  95% confidence interval: 0.923 – 1.128,  
248 Figure 1a). To determine if differences were not detected due to underlying differences in  
249 the distributions of  $\phi$ , we compared  $\Delta\eta$  estimated from signal peptides and pseudo-signal  
250 peptides. Again, no statistically significant difference from the  $y = x$  line was found and the  
251 expected codon frequencies are similar ( $\beta$  95% confidence interval: 0.939 – 1.149, Figure 1b  
252 and S5). Similar results are obtained using the signal peptides with a D-score greater than  
253 0.75 or the confirmed signal peptides (Figures S6 - S7). We also see no significant result when

254 using empirically estimated  $\phi$  values ( $\beta = 0.908$ , 95% confidence interval: 0.67 – 1.16, Figure  
255 S8), although these results show much more variability. The increased variability in the  $\Delta\eta$   
256 values and corresponding regression line is unsurprising given the empirically estimated  $\phi$   
257 values are subject to significant noise (Figure S2), but are, in this case, treated as fixed  
258 values representative of the true average protein production rate for a gene.

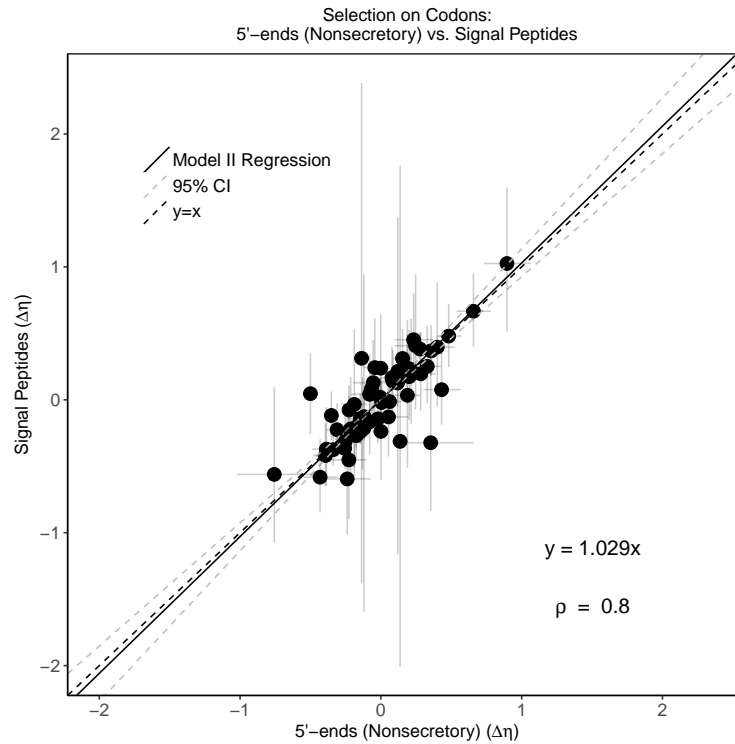

(a)

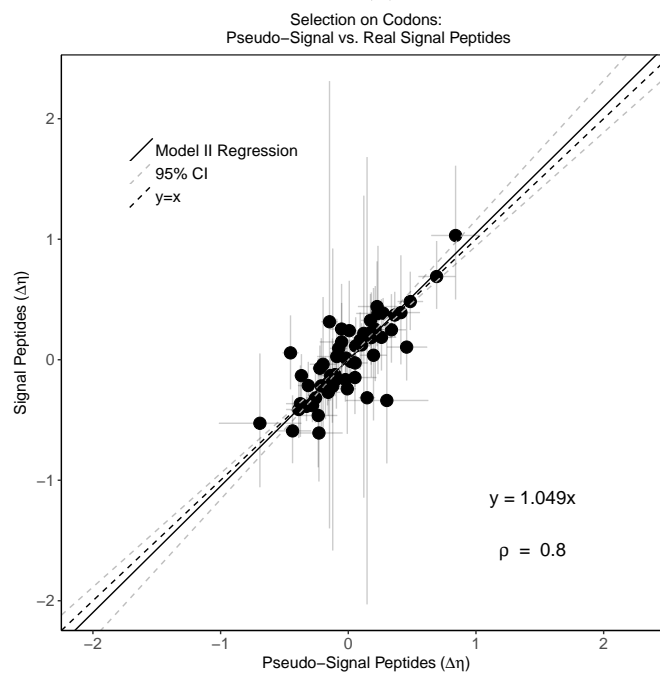

(b)

Figure 1: Comparing the pausing time estimates  $\Delta\eta$  between (a) the 5'-ends of nonsecretory genes or (b) pseudo-signal peptides to signal peptides. Grey dashed lines represent the 95% confidence intervals of the regression line. Results clearly show a strong positive linear relationship ( $\rho = 0.80$ ) between the regions and a regression line not significantly different from  $y = x$ .

259 The Model-II regression lines estimated from the mature vs. signal peptide comparison  
260 and the pseudo-mature vs. pseudo-signal peptide comparison are similar, which serves as  
261 further evidence the selection on codon usage in signal peptides and the 5'-ends of nonse-  
262 cretory genes is the same (Figure 2). The mature vs. signal peptide comparison produces  
263 a regression line with slope  $\beta = 0.480$  (95% confidence interval: 0.428 - 0.574), while the  
264 pseudo-mature vs. pseudo-signal peptide comparison produces a regression line with slope  
265  $\beta = 0.496$  (95% confidence interval: 0.490 - 0.533). If selection on codon usage differs in  
266 signal peptides from pseudo-signal peptides, we would not expect to see similar regression  
267 lines.

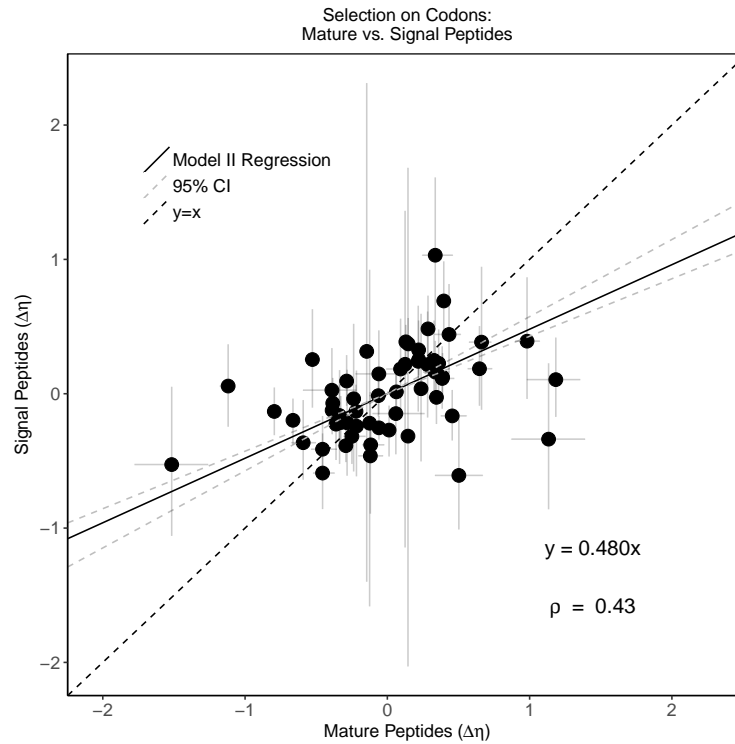

(a)

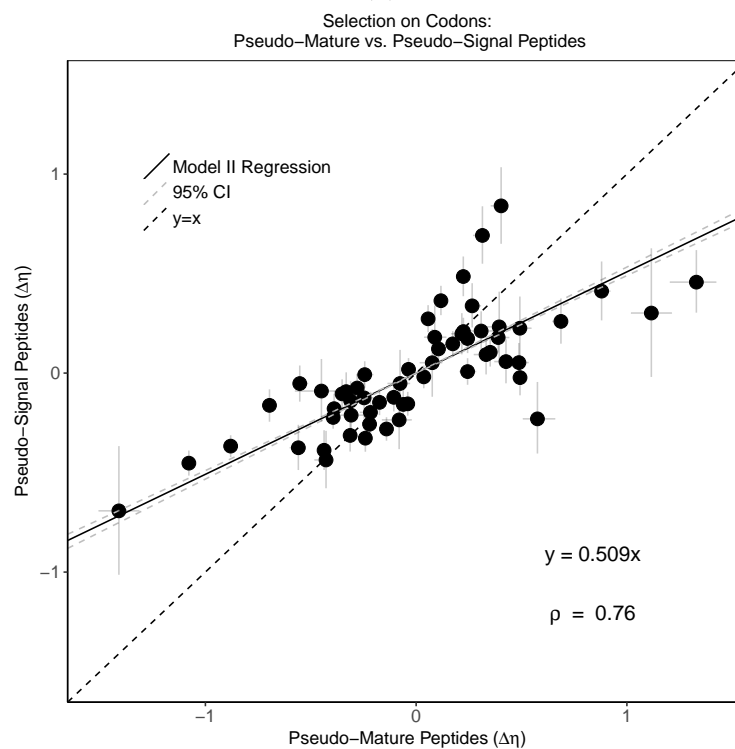

(b)

Figure 2: (a) Comparing the codon pausing time estimates  $\Delta\eta$  between mature peptides and signal peptide regions. Grey dashed lines represent the 95% confidence intervals of the regression line. Results show a positive linear relationship ( $\rho = 0.43$ ) between the  $\Delta\eta$  estimates for the two regions. This indicates codons favored in one region tend to be favored in the other. (b) Same comparison for pseudo-signal peptide genes. Regression estimates are similar to those estimated for the mature and signal peptide comparison.

268 Noting CAI and tAI do not account for the effects of gene expression, mutation bias, drift,  
269 or amino acid biases, we found signal peptides have lower CAI and tAI values compared to  
270 the first 23 codons of nonsecretory genes (one-tailed Welch's t-test,  $p < 10^{-5}$ ). This was also  
271 the case when looking at the pseudo-signal peptides, which normalizes for protein production  
272 rates  $\phi$ . These results with CAI and tAI can potentially be explained by either the preferred  
273 use of inefficient codons in signal peptides *or* as artifacts of amino acid biases. Signal peptides  
274 have a different amino acid composition from the 5'-end due to the required physicochemical  
275 properties of this region (Figure S9). We examined the robustness of tAI and CAI as a  
276 means of quantifying differences in selection on codon usage when underlying differences  
277 between amino acid composition and  $\phi$  exists using data simulated under the same mutation  
278 bias  $\Delta M$  and pausing time  $\Delta\eta$  parameters. When comparing simulated signal peptides to  
279 simulated 5'-end of nonsecretory genes and simulated pseudo-signal peptides using CAI, the  
280 simulated signal peptides are found to have a significantly lower mean CAI (Welch's t-test,  
281  $p < 0.05$ ) 100% of the time (Figure 3a-b), despite the fact the  $\Delta\eta$  and  $\Delta M$  parameters used  
282 to simulate these regions were the same. This suggests the amino acid usage is biasing the  
283 signal peptides towards a lower CAI.

284 When using simulated 5'-ends of nonsecretory genes which have amino acid composition  
285 consistent with the signal peptides, the p-values were heavily skewed towards 1. (Figure  
286 3c). This odd behavior is due to the differences in the  $\phi$  distribution differences of the signal  
287 peptide and nonsecretory genes. As the former has a higher mean  $\phi$ , the signal peptides on  
288 average will have a stronger CUB after normalizing for the amino acid biases. A one-tailed  
289 Welch's t-test with the alternative hypothesis being signal peptides have a lower mean CAI,  
290 when in reality they likely have a larger mean CAI, would skew the p-value distribution  
291 towards 1. Importantly, ROC-SEMPPR did not detect significant differences between signal  
292 peptides and the 5'-ends of non-secretory genes, despite differences in the  $\phi$  distributions  
293 (Figure 1a). When normalizing for both amino acid usage and  $\phi$ , significant differences in  
294 CAI are found approximately 4% of the time, which is close to the expected number of false



295 positives at the 0.05 significance level (Figure 3d). Similar results are seen when using tAI  
296 (Figure S10). Our results indicate CAI and tAI are prone to inflating differences in CUB  
297 between two regions when differences in  $\phi$  and amino acid usage are not accounted for.

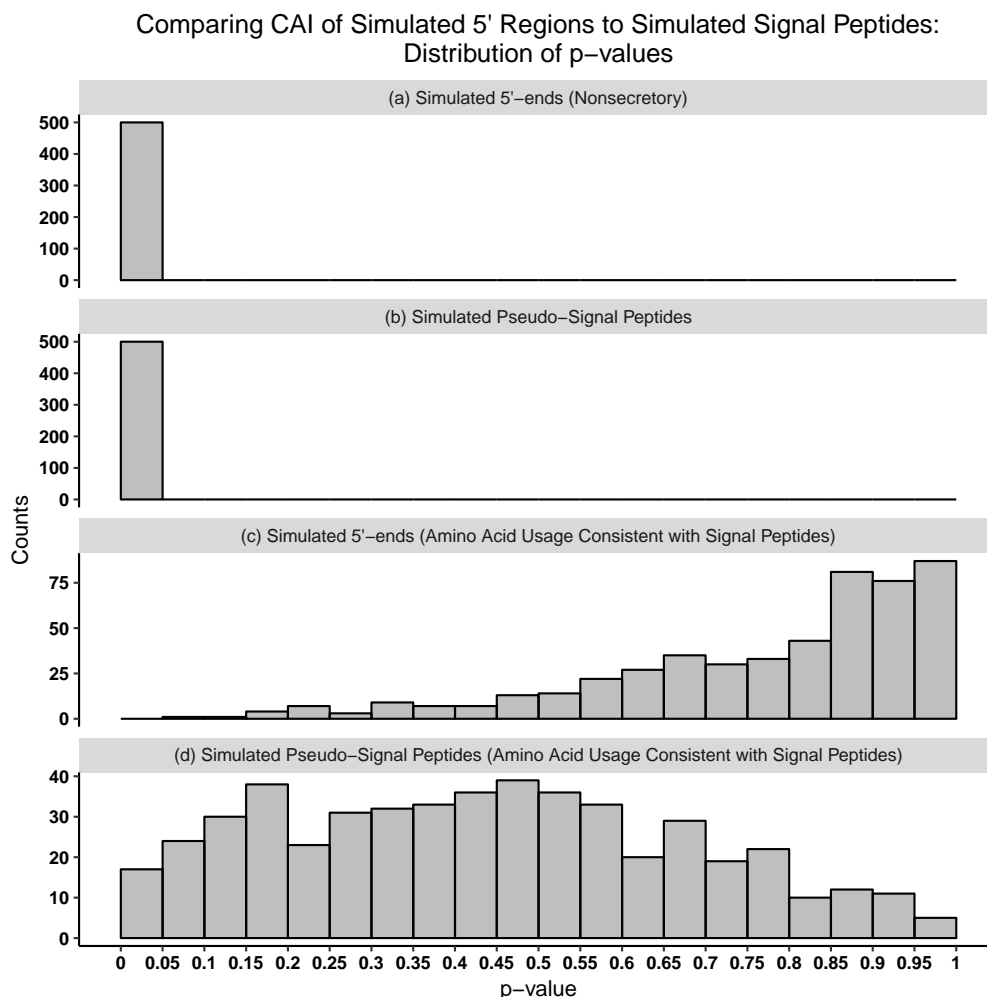

Figure 3: Distribution of p-values from a one-tailed Welch's t-test comparing CAI in simulated nonsecretory 5'-ends, pseudo-signal peptides, and signal peptides in which all regions were simulated using the same pausing time  $\Delta\eta$  and  $\Delta M$  parameters. (a-b) The CAI of simulated signal peptides was found to be significantly lower on average at a 100% false positive rate when compared to simulated 5'-ends of nonsecretory genes and simulated pseudo-signal peptides. (c) Adjusting the amino acid frequencies of the 5'-end of nonsecretory genes to match those of the signal peptides results in a heavily skewed distribution. (d) Adjusting the amino acid frequencies of the pseudo-signal peptides to match those of the signal peptides results in a more uniform distribution.

298 Notably, selection on codon usage near the N-terminus appears to be on average approx-

299 imately 50% weaker than the remainder of the gene based on the slope  $\beta$ . Previous analyses  
300 using a variety of codon usage metrics found CUB near the 5'-end to be weaker than mid-  
301 dle sections of the gene (Eyre-Walker, 1996; Gilchrist and Wagner, 2006; Gilchrist, 2007;  
302 Hockenberry *et al.*, 2014; Qin *et al.*, 2004; Power *et al.*, 2004), with these differences being  
303 attributed to selection against nonsense errors and to maintain translation initiation effi-  
304 ciency by reducing mRNA secondary structure. We confirm this trend using ROC-SEMPPR  
305 (Figure S11).

306 It was also proposed selection for translation initiation efficiency was shaping signal  
307 peptide codon usage, particularly the use of lysine codon AAA, in signal peptides at position  
308 2 of the peptide (Zalucki *et al.*, 2007). We do find AAA appears to be slightly favored in signal  
309 peptides, which is not the case in the pseudo-signal peptides, although the 95% posterior  
310 probability interval overlaps with the  $y = x$  line (Figure S12). If the slight but statistically  
311 insignificant favored usage of AAA is due to an increased selection for translation initiation  
312 efficiency in signal peptides, then removing the first 3 codons when analyzing signal peptide  
313 codon usage should remove this effect. Doing so results in no change in the behavior of AAA,  
314 suggesting if there is any selection for increased AAA usage in signal peptides, it is not due  
315 to selection for increased translation initiation efficiency (Figure S13). Notably, AAA is  
316 both mutationally and selectively-favored for lysine by *E. coli*. Keeping in mind selection on  
317 CUB is weaker near the 5'-end of the genes in *E. coli*, the combination of weaker selection,  
318 mutational favorability, and a slight increase in the occurrence of lysine in signal peptides  
319 (Figure S9) likely drives up the frequency of codon AAA in signal peptides relative to the  
320 5'-ends of nonsecretory genes.

## 321 Discussion

322 In summary, we found no evidence suggesting a general significant difference between selec-  
323 tion on codon usage in signal peptides and the 5'-ends of nonsecretory genes in *E. coli* using

324 a mechanistic model of CUB which incorporates the effects of selection, mutation bias, gene  
325 expression, and amino acid usage. Instead, we find failures to account for amino acid usage  
326 and protein production rate  $\phi$  resulted in the commonly used codon metrics CAI and tAI  
327 indicating significant differences between regions simulated under the same parameters, but  
328 these differences disappear when accounting for both amino acid usage and  $\phi$ . Importantly,  
329 both amino acid usage and  $\phi$  were significant confounding factors when analyzing CUB with  
330 CAI and tAI – only accounting for one of these factors still suggested significant differences  
331 between the simulated regions. Although we are not the first to note potential issues with  
332 metrics like CAI or tAI for intragenic CUB analysis (Hockenberry *et al.*, 2014), our results  
333 demonstrate these metrics are insufficient for intragenic CUB analysis when these regions  
334 have drastically different amino acid usage or  $\phi$  distributions, resulting in incorrect biological  
335 interpretation.

336 This is not to say CUB plays no role in the secretion of specific proteins. For example,  
337 experimental evidence demonstrates codon optimization of the *E. coli* maltose binding pro-  
338 tein's (MBP) signal peptide results in a decrease in protein abundance. Evidence suggests  
339 this is due to increased targeting of the codon optimized MBP by proteases due to improper  
340 folding (Zalucki and Jennings, 2007; Zalucki *et al.*, 2008). However, CUB as a means to  
341 guide proper co-translational folding is not a phenomenon unique to proteins with a signal  
342 peptide (Chaney and Clark, 2015; Pechmann and Frydman, 2013; Yu *et al.*, 2015). Although  
343 inefficient codons might be crucial to the fold of certain secreted proteins, our results do not  
344 indicate this is any more or less so than nonsecretory genes.

345 Although we found no general difference in selection on codon usage between signal pep-  
346 tides and the 5'-ends, it is possible CUB differences exist among the chaperone-dependent  
347 and chaperone-independent mechanisms of the Sec pathway. We are unaware of any CUB  
348 comparisons of these three groups, but researchers have noted a region of slower translation  
349 downstream from the signal peptide of transmembrane proteins, which are typically secreted  
350 via SRP in bacteria (Natale *et al.*, 2008). Using a modified form of the tAI, previous efforts

351 found a consistent trend of inefficient codons 35-40 codons downstream of the SRP-binding  
352 site in various yeasts species (Pechmann *et al.*, 2014). Ribosomal profiling data taken from *S.*  
353 *cerevisiae* provided experimental support for this hypothesis; however this analysis was lim-  
354 ited to a small, closely-related phylogeny. Further work is needed to determine the generality  
355 of this observation to bacteria and other eukaryotes. Similarly, SRP-dependent transmem-  
356 brane proteins in *E. coli* have a higher frequency of "programmed pause sites," areas of high  
357 ribosomal density downstream from Shine-Dalgarno-like sequences, at the beginning of the  
358 gene (Fluman *et al.*, 2014). A higher frequency of programmed pause sites was not observed  
359 in the region downstream from the signal peptides in periplasmic proteins. Notably, this  
360 region of higher ribosome density downstream from the signal peptides was not observed in  
361 periplasmic proteins, which are normally secreted via SecA/B (Natale *et al.*, 2008; Tsirig-  
362 otaki *et al.*, 2017) However, recent work challenges the findings that Shine-Dalgarno-like  
363 sequences are largely responsible for translational pause (Mohammad *et al.*, 2016).

364 Notably, we do find selection on CUB is weaker at the 5'-ends relative to later portions  
365 of the gene, corroborating previous work (Eyre-Walker, 1996; Gilchrist and Wagner, 2006;  
366 Gilchrist, 2007; Hockenberry *et al.*, 2014; Power *et al.*, 2004; Qin *et al.*, 2004). Weaker  
367 selection at the 5'-ends is often attributed to selection against nonsense errors and selection  
368 against mRNA secondary structure. Importantly, the advent of ribosome profiling revealed  
369 the presence of high ribosomal density at the 5'-ends, often referred to as the "5'-ramp"  
370 (Tuller *et al.*, 2010). The 5'-ramp was originally thought to be the result of increased  
371 selection for slow translation at the 5'-end to reduce ribosomal interference further down  
372 the transcript, but simulations suggest the 5'-ramp is an artifact of short genes with high  
373 initiation rates (Shah *et al.*, 2013). Selection for co-translational folding is also thought to  
374 shape intragenic CUB (Chaney and Clark, 2015; Pechmann and Frydman, 2013; Yu *et al.*,  
375 2015). Further work is needed to understand how these various selective forces are balanced  
376 to maintain translation efficiency and efficacious protein biogenesis.

377 Ultimately, our work further illustrates the value of population genetics models which

378 include nonadaptive evolutionary forces when analyzing genomic data. Biologists are often  
379 tempted to explain statistically significant results in the context of selection and adaptation,  
380 but researchers must first provide evidence these results cannot be explained by nonadap-  
381 tive evolutionary forces (eg. mutation bias and genetic drift) and/or as an artifact of some  
382 other constraint on the trait of interest (eg. amino acid biases). We are certainly not the  
383 first to note the importance of considering nonadaptive explanations. Almost four decades  
384 ago, Gould and Lewontin (1979) critiqued the propensity of evolutionary biologists to invoke  
385 natural selection and adaptation without seriously considering possible nonadaptive expla-  
386 nations. The explosion of genomic data means now, more than ever, biologists should be  
387 hesitant to adopt adaptationists explanations to biological phenomenon without first inves-  
388 tigating if such results could be shaped by nonadaptive forces. The embrace of "big data"  
389 by biological researchers is a double-edged sword: while we have the ability to investigate  
390 patterns and explore hypotheses which would not have been possible 20 years ago, the use  
391 of large datasets can lead to incredibly small p-values, which are often misinterpreted as  
392 both evidence of a strong effect and a small probability of the null hypothesis being true  
393 (Wasserstein and Lazar, 2016). The misinterpretation of p-values and a bias towards adap-  
394 tationist explanations can be a dangerous combination, with researchers over-interpreting  
395 their results and misleading other researchers.

396 The development of models incorporating both adaptive and nonadaptive evolutionary  
397 forces will be important for understanding the selective forces shaping complex biological  
398 data. In the case of the studying CUB, codon indices like CAI have long been employed,  
399 but these metrics often are unable to disentangle the effects of amino acid biases, mutation,  
400 and selection. While often good proxies of gene expression, these indices do not directly  
401 incorporate gene expression information into the weights estimated for each codon. This  
402 could lead to further problems of conflating mutation bias with selection when comparing  
403 CUB across regions. In contrast, because ROC-SEMPPR is grounded in population genetics  
404 and thus, is able to decouple selection and mutation bias, it serves as a more accurate and

405 evolutionarily-grounded tool for researchers interested in studying CUB.

## References

- Bendtsen, J. D., Kiemer, L., Fausbøll, A., and Brunak, S. (2005). Non-classical protein secretion in bacteria. *BMC Microbiology*, **5**(1), 58.
- Bulmer, M. (1990). The effect of context on synonymous codon usage in genes with low codon usage bias. *Nucleic Acids Res.*, **18**(10), 2869–2873.
- Burns, D. and Beacham, I. (1985). Rare codons in *E. coli* and *S. typhimurium* signal sequences. *FEBS Letters*, **189**, 318–324.
- Chaney, J. and Clark, P. (2015). Roles for synonymous codon usage in protein biogenesis. *Annu. Rev. Biophysics*, **44**, 143–166.
- Charlesworth, B. (2009). Effective population size and patterns of molecular evolution and variation. *Nature Reviews Genetics*, **10**, 195–205.
- dos Reis, M. (2016). *tAI: The tRNA adaptation index*. R package version 0.2.
- dos Reis, M., Wernisch, L., and Savva, R. (2003). Unexpected correlations between gene expression and codon usage bias from microarray data for the whole *Escherichia coli* k-12 genome. *Nucleic Acids Research*, **31**(23), 6976–6985.
- dos Reis, M., Savva, R., and Wernisch, L. (2004). Solving the riddle of codon usage preferences: a test for translational selection. *Nucleic Acids Research*, **32**(17), 5036–5044.
- Eyre-Walker, A. (1996). Synonymous codon bias is related to gene length in *Escherichia coli*: Selection for translational accuracy? *Mol. Biol. Evol.*, **13**(6), 864–872.
- Fluman, N., Navon, S., Bibi, E., and Pilpel, Y. (2014). mrna-programmed translation pauses in the targeting of e. coli membrane proteins. *eLife*, **3**, e03440.

- Gilchrist, M. (2007). Combining models of protein translation and population genetics to predict protein production rates from codon usage patterns. *Mol. Biol. Evol.*, **24**(11), 2362–2372.
- Gilchrist, M. and Wagner, A. (2006). A model of protein translation inducing codon bias, nonsense errors, and ribosome recycling. *Journal of Theoretical Biology*, **239**, 417–434.
- Gilchrist, M., Chen, W., Shah, P., Landerer, C., and Zaretzki, R. (2015). Estimating gene expression and codon-specific translational efficiencies, mutation biases, and selection coefficients from genomic data alone. *Genome Biology and Evolution*, **7**, 1559–1579.
- Gould, S. and Lewontin, R. (1979). The spandrels of san marco and the panglossian paradigm: A critique of the adaptationist programme. *Proceedings of the Royal Society of London*, **205**(1161), 581–598.
- Green, E. and Mecsas, J. (2016). Bacterial secretion systems - an overview. *Microbiol Spectr.*, **4**(1).
- Hockenberry, A., Sirer, M., Amaral, L., and Jewett, M. (2014). Quantifying position-dependent codon usage bias. *mol. Biol. Evol.*, **31**(7), 1880–1893.
- Ikemura, T. (1981). Correlation between the abundance of *Escherichia coli* transfer rnas and the occurrence of the respective codons in its protein genes: A proposal for a synonymous codon choice that is optimal for the *E. coli* translational system. *Journal of Molecular Biology*, **151**, 389–409.
- Inouye, S., Soberon, X., Franceschini, T., Nakamura, K., Itakura, K., and Inouye, M. (1982). Role of positive charge on the amino-terminal region of the signal peptide in protein secretion across the membrane. *Proc. Natl. Acad. Sci. USA.*, **79**, 3438–3441.
- Landerer, C., Cope, A., Zaretzki, R., and Gilchrist, M. (2018). Anacoda: analyzing codon data with bayesian mixture models. *Bioinformatics*, page bty138.



- Li, Y., Xie, Z., Du, Y., Zhou, Z., Mao, X., Lv, L., and Li, Y. (2009). The rapid evolution of signal peptides is mainly caused by relaxed selection on non-synonymous and synonymous sites. *Gene*, **436**, 8–11.
- Liu, H., Rahman, S., Mao, Y., Xu, X., and Tao, S. (2017). Codon usage bias in 5' terminal coding sequences reveals distinct enrichment of gene functions. *Genomics*, **109**, 506–513.
- Lynch, M., Ackerman, M., Gout, J., Long, H., Sung, W., Thomas, W., and Foster, P. (2016). Genetic drift, selection and the evolution of the mutation rate. *Nature Reviews Genetics*, **17**, 704–714.
- Maechler, M., Rousseeuw, P., Struyf, A., Hubert, M., and Hornik, K. (2018). *cluster: Cluster Analysis Basics and Extensions*. R package version 2.0.7-1 — For new features, see the 'Changelog' file (in the package source).
- Mahlab, S. and Linial, M. (2014). Speed controls in translating secretory proteins in eukaryotes - an evolutionary perspective. *PLoS Computational Biology*, **10**(1), e1003294.
- Mohammad, F., Woolstenhulme, C., Green, R., and Buskirk, A. (2016). Clarifying the translational pausing landscape in bacteria by ribosome profiling. *Cell Reports*, **14**, 686–694.
- Natale, P., Bruser, T., and Driessen, A. (2008). Sec- and tat-mediated protein secretion across the bacterial cytoplasmic membrane—distinct translocases and mechanisms. *Biochimica et Biophysica Acta*, **1778**, 1735–1756.
- Nesmeyanova, M., Karamyshev, A., Karamysheva, Z., Kalinin, A., Ksenzenko, V., and Kajava, A. (1997). Positively charged lysine at the n-terminus of the signal peptide of the *Escherichia coli* alkaline phosphatase provides the secretion efficiency and is involved in the interaction with anionic phospholipids. *FEBS Letters*, **403**, 203–207.

- Pechmann, S. and Frydman, J. (2013). Evolutionary conservation of codon optimality reveals hidden signatures of cotranslational folding. *Nature Structural and Molecular Biology*, **20**(2), 237–243.
- Pechmann, S., Chartron, J., and Frydman, J. (2014). Local slowdown of translation by nonoptimal codons promotes nascent-chain recognition by srp *in vivo*. *Nature Structural and Molecular Biology*, **21**(12), 1100–1105.
- Peden, J. (1999). *Analysis of Codon Usage*. Ph.D. thesis, University of Nottingham.
- Petersen, T., Brunak, S., von Heijne, G., and Nielsen, H. (2011). Signalp 4.0: discriminating signal peptides from transmembrane regions. *Nature Methods*, **8**(10), 785–786.
- Power, P., Jones, R., Beacham, I., Bucholtz, C., and Jennings, M. (2004). Whole genome analysis reveals a high incidence of non-optimal codons in secretory signal sequences of *Escherichia coli*. *Biochemical and Biophysical Research Communications*, **322**, 1038–1044.
- Powers, T. and Walter, P. (1997). Co-translational protein targeting catalyzed by the *Escherichia coli* signal recognition particle and its receptor. *The EMBO Journal*, **16**(16), 4880–4886.
- Puziss, J., Fikes, J., and Bassford, P. (1989). Analysis of mutational alterations in the hydrophilic segment of the maltose-binding protein signal peptide. *Journal of Bacteriology*, **171**, 2303–2311.
- Qin, H., Wu, W., Kreitman, J. C. M., and Li, W. (2004). Intra-genic spatial patterns of codon usage bias in prokaryotic and eukaryotic genomes. *Genetics*, **168**, 2245–2260.
- R Core Team (2018). *R: A Language and Environment for Statistical Computing*. R Foundation for Statistical Computing, Vienna, Austria.
- Saier, M. (2006). Protein secretion systems in gram-negative bacteria. *Microbe*, **1**(9), 414–419.

REFERENCES

27

- Samant, S., Gupta, G., Karthikeyan, S., and A. Nair, S. H., Sambasivam, G., and Suku-  
maran, S. (2014). Effect of codon-optimized *E. coli* signal peptides on recombinant *Bacillus*  
*stearothermophilus* maltogenic amylase periplasmic localization, yield and activity. *J. Ind.*  
*Microbial Biotechnol*, **41**, 1435–1442.
- Shah, P. and Gilchrist, M. (2011). Explaining complex codon usage patterns with selection  
for translational efficiency, mutation bias, and genetic drift. *PNAS*, **108**(25), 10231–10236.
- Shah, P., Ding, Y., Niemczyk, M., Kudla, G., and Plotkin, J. (2013). Rate-limiting steps in  
yeast protein translation. *Cell*, **153**, 1589–1601.
- Sharp, P. and Li, W. (1987). The codon adaptation index - a measure of directional syn-  
onymous codon usage bias, and its potential applications. *Nucl. Acids Research*, **15**(3),  
1281–1295.
- Sokal, R. and Rohlf, F. (1995). *Biometry - The Principles and Practices of Statistics in*  
*Biological Research*. W.H. Freeman, New York, 3rd edition.
- Tsirigotaki, A., Geyter, J. D., Sostaric, N., Economou, A., and Karamanou, S. (2017).  
Protein export through the bacterial sec pathway. *Nature Reviews: Microbiology*, **15**,  
21–36.
- Tuller, T., Carmi, A., Vestsigian, K., Navon, S., Dorfan, Y., Zaborske, J., Pan, T., Dahan, O.,  
Furman, I., and Pilpep, Y. (2010). An evolutionarily conserved mechanism for controlling  
the efficiency of protein translation. *Cell*, **141**, 344–354.
- Vlasuk, G., Inouye, S., Ito, H., Itakura, K., and Inouye, M. (1983). Effects of the complete  
removal of basic amino acid residues from the signal peptide on secretion of lipoprotein in  
*Escherichia coli*. *J. Biol. Chem.*, **258**, 7141–7148.
- Wallace, E., Airoidi, E., and Drummond, D. (2013). Estimating selection on synonymous

- codon usage from noisy experimental data. *Molecular Biology and Evolution*, **30**(6), 1438–1453.
- Wasserstein, R. and Lazar, N. (2016). The asa’s statement on p-values: Context, process, and purpose. *The American Statistician*, **70**(2), 129–133.
- Yu, C., Dang, Y., Zhou, Z., Wu, C., Zhao, F., Sachs, M., and Liu, Y. (2015). Codon usage influences the local rate of translation elongation to regulate co-translational protein folding. *Molecular Cell*, **59**, 744–754.
- Zalucki, Y. and Jennings, M. (2007). Experimental confirmation of a key role for non-optimal codons in protein export. *Biochemical and Biophysical Research Communications*, **355**, 143–148.
- Zalucki, Y., Power, P., and Jennings, M. (2007). Selection for efficient translation initiation biases codon usage at the second amino acid position in secretory proteins. *Nucleic Acids Research*, pages 1–7.
- Zalucki, Y., Gittins, K., and Jennings, M. (2008). Secretory signal sequence non-optimal codons are required for expression and export of  $\beta$ -lactamase. *Biochemical and Biophysical Research Communications*, **366**, 135–141.
- Zalucki, Y., Beacham, I., and Jennings, M. (2009). Biased codon usage in signal peptides: a role in protein export. *Trends in Microbiology*, **17**(4), 146–150.
- Zalucki, Y., Jones, C., Ng, P., Schulz, B., and Jennings, M. (2010). Signal sequence non-optimal codons are required for the correct folding of mature maltose binding protein. *Biochimica et Biophysica Acta*, **1798**, 1244–1249.
- Zalucki, Y., Beacham, I., and Jennings, M. (2011a). Coupling between codon usage, translation and protein export in *Escherichia coli*. *Biotechnology Journal*, **6**, 660–667.

*REFERENCES*

29

Zalucki, Y., Shafer, W., and Jennings, M. (2011b). Directed evolution of efficient secretion in the srp-dependent export of tolB. *Biochimica et Biophysica Acta*, **1808**, 2544–2550.
